# Supplementary material
Source: PubMed Central journal article supplement (PMC3566655)
Supplement: Supp_Fig2.pdf [file Supp_Fig2.pdf]

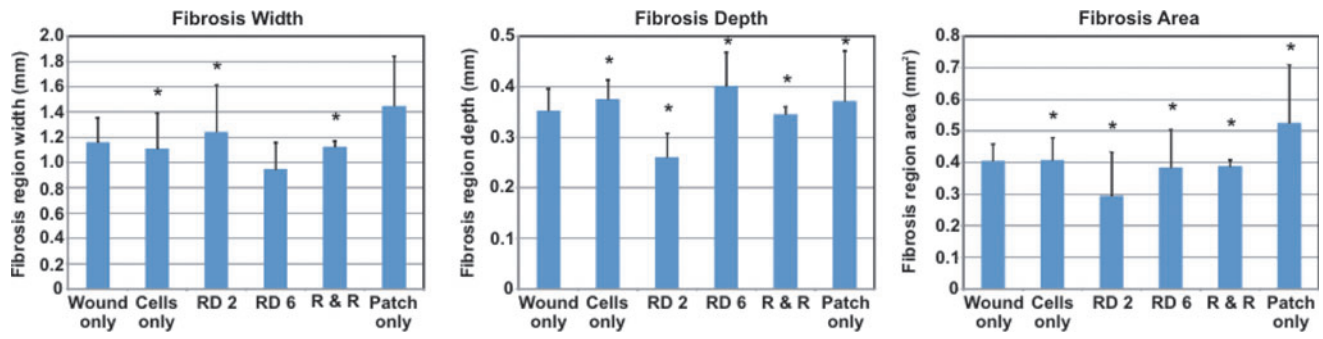

**SUPPLEMENTARY FIG. S2.** Additional fibrotic area measures performed by a blinded researcher. Results were confirmed to follow similar trends as the original data, verifying robustness of results and analysis. \*indicates statistical significance compared to wound only controls,  $p < 0.05$ .
