# Supplementary material
Source: PubMed Central journal article supplement (PMC3566655)
Supplement: Supp_Fig3.pdf [file Supp_Fig3.pdf]

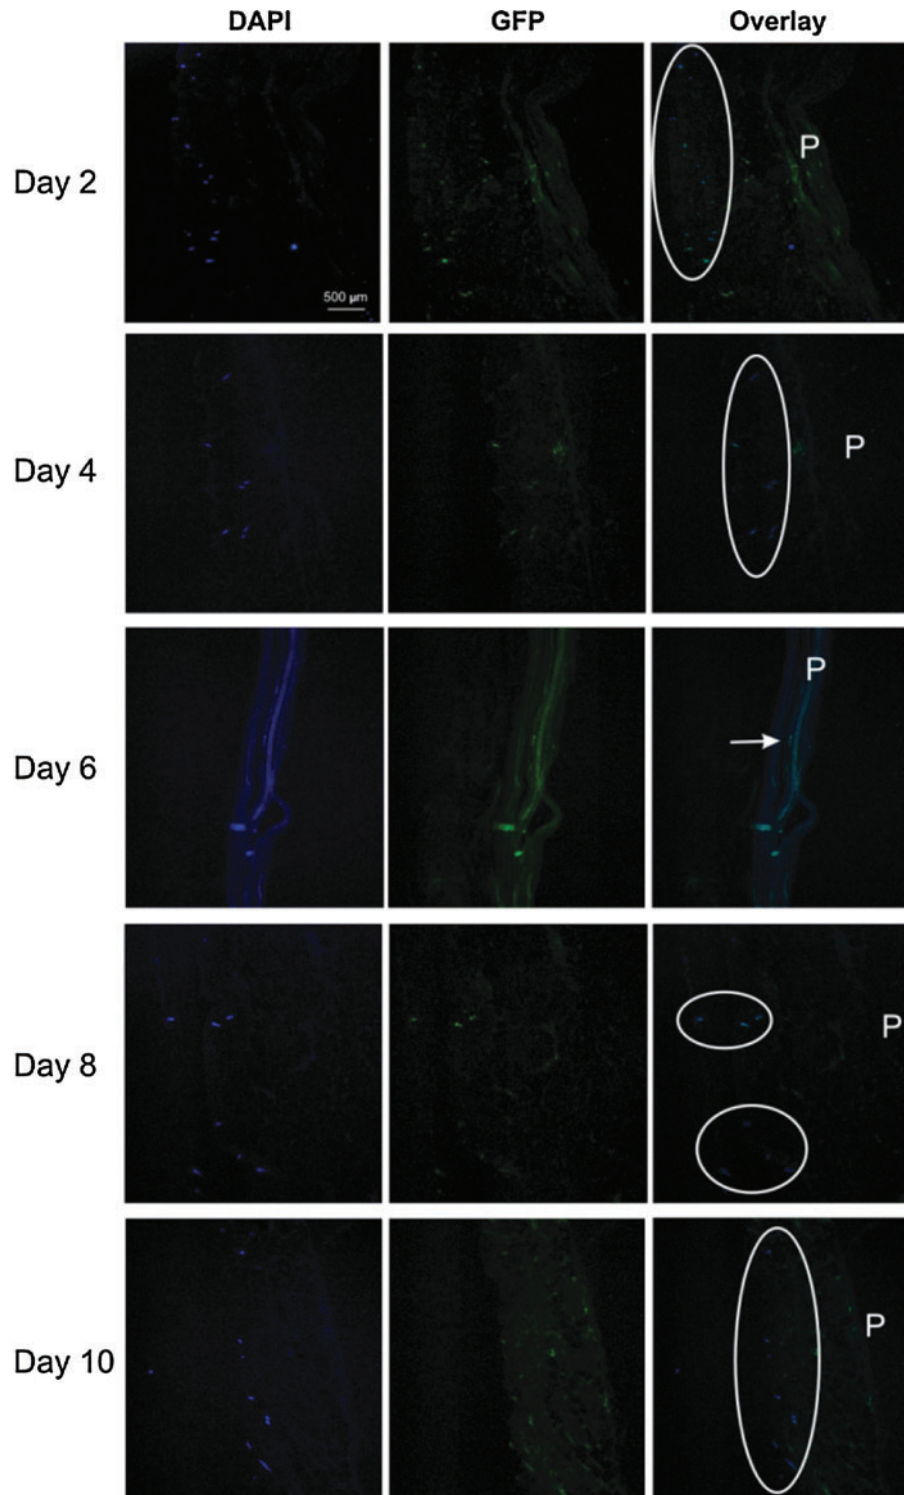

**SUPPLEMENTARY FIG. S3.** Fluorescence images of wound areas in the RD 6 group showing evidence of transplanted adipose-derived stromal cells (ASCs) at early time points in the wound. Although faint, green fluorescent protein (GFP) signals were found to colocalize with DAPI positive staining, indicating presence of transplanted ASCs in the wounds (white circles). The faint GFP signal may be due to moderate loss of signal by the cells. Sparse DAPI-positive signals may indicate that few other cells (not only transplanted cells) were present, because during healing, extracellular matrix components dominate a given area. White arrow indicates a transplanted cell in the autofluorescent patch material (image taken before patch removal). At the early time points, transplanted cells (white circles) could be seen located away from the patch (P) and deeper into the wounds, suggesting transplanted cell migration into the wound.
